# Supplementary material
Source: Springer Nature journal article supplement (https://www.springermedizin.de/resource/supplementary/12958_2003_125_MOESM1_ESM.pdf/9566174)

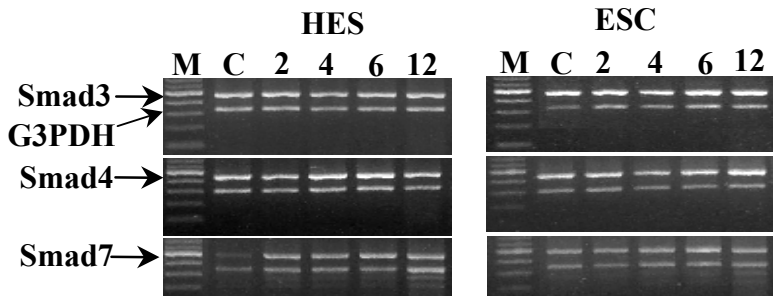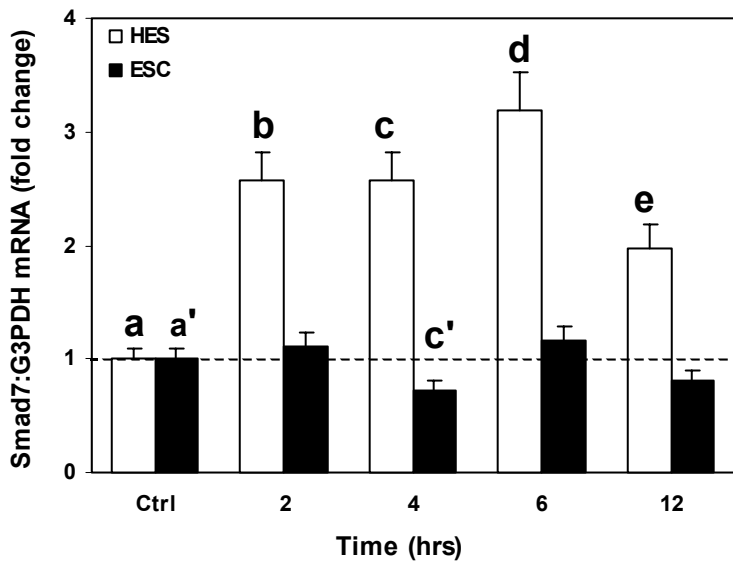

Supplement: MOESM1 [file 9566174]
